# Supplementary material for: The Glaciers of the Dolomites: last 40 years of melting
Source: Copernicus journal article supplement (doi:10.5194/egusphere-2024-1357), 2024-06-18
Supplement: Supplementary file 1 [file egusphere-2024-1357-supplement.pdf]

# Supplement of

## The Glaciers of the Dolomites: last 40 years of melting

Andrea Securo <sup>1,2,3</sup>, Costanza Del Gobbo <sup>4</sup>, Giovanni Baccolo <sup>5,3</sup>, Carlo Barbante <sup>1,2,3</sup>,  
 Michele Citterio <sup>6,3</sup>, Fabrizio De Blasi <sup>2,1,3</sup>, Marco Marcer <sup>7</sup>, Mauro Valt <sup>8</sup>, and Renato R. Colucci <sup>2,3,4</sup>

5 1 Department of Environmental Sciences, Informatics and Statistics, University Ca Foscari of Venice

2 Institute of Polar Sciences, National Research Council of Italy

3 Comitato Glaciologico Italiano

4 Alpine-Adriatic Meteorological Society

10 5 Department of Science, Roma Tre University

6 Department of Glaciology and Climate, Geological Survey of Denmark and Greenland

7 Department of Environmental and Resource Engineering, Geotechnics & Geology, Technical University of Denmark

8 Agency for Environmental Prevention and Protection of the Veneto Region

Correspondence to: Andrea Securo (andrea.securo@unive.it)

15

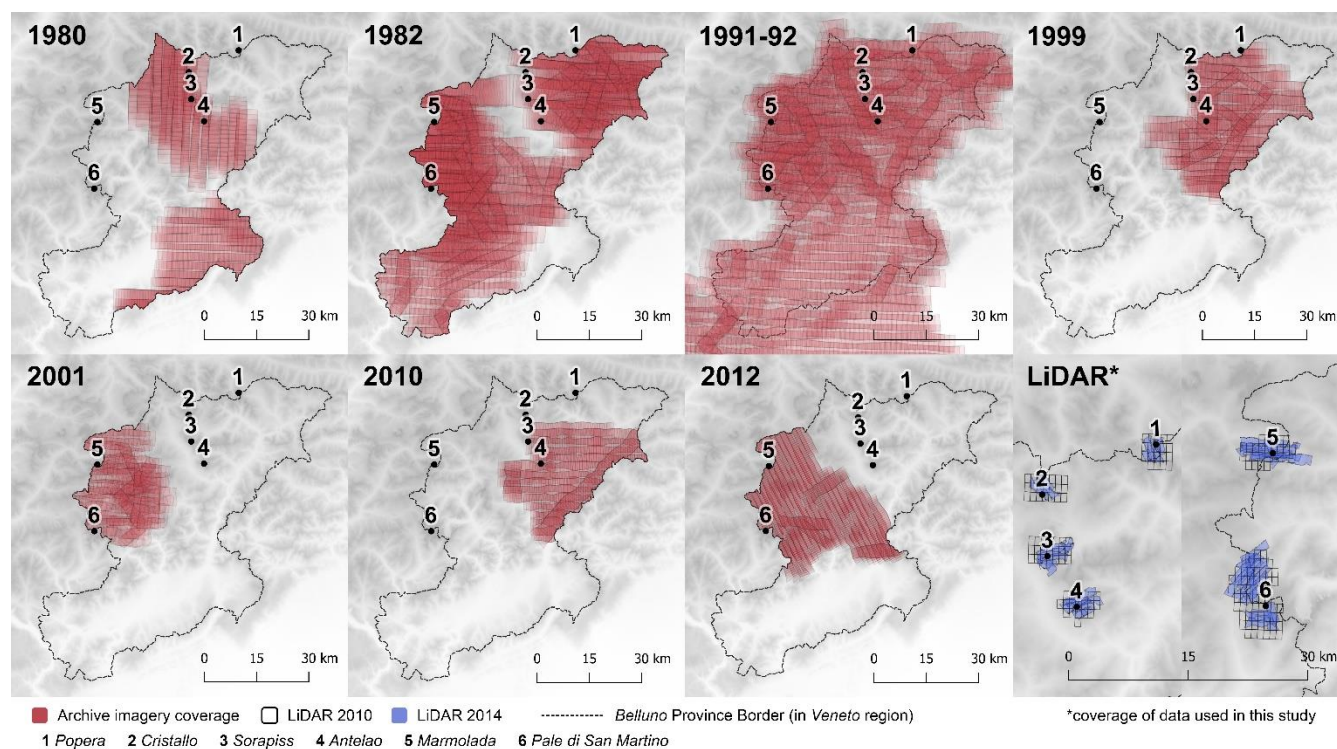

**Figure S1: Archival imagery (1980, 1982, 1991-92, 1999, 2001, 2010,2012) and LiDAR (2010, 2014) data coverage in the Veneto Region (Bolzano province, black line). Most of the archival imagery extends with some frames across the administrative border. Reference dates and data description are available in Table 2.**

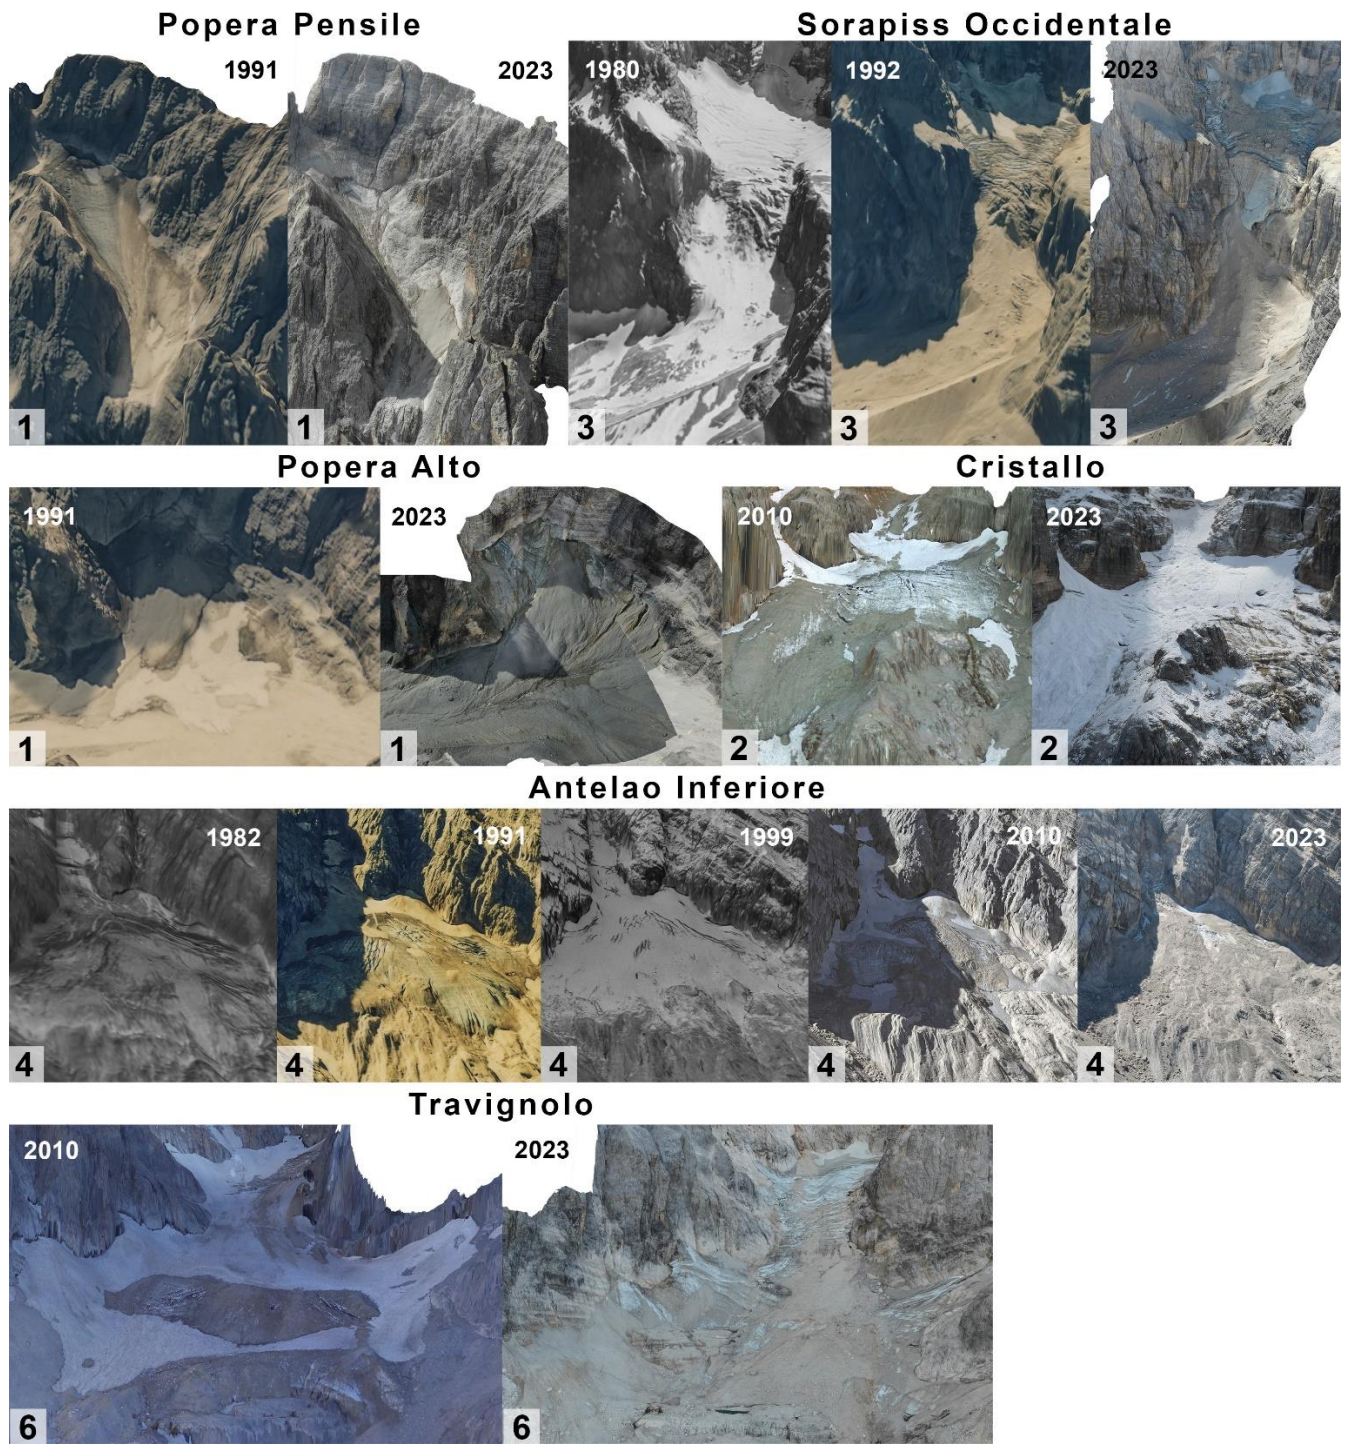

Figure S2. Examples of the reconstructed 3D textured models (i.e., triangular meshes derived from dense point clouds) of the Dolomites glaciers during different decades. Missing reconstructions from Marmolada, Fradusta and Antelao are shown in the manuscript (Fig. 3).



## 2010-2014 Surface Elevation Change

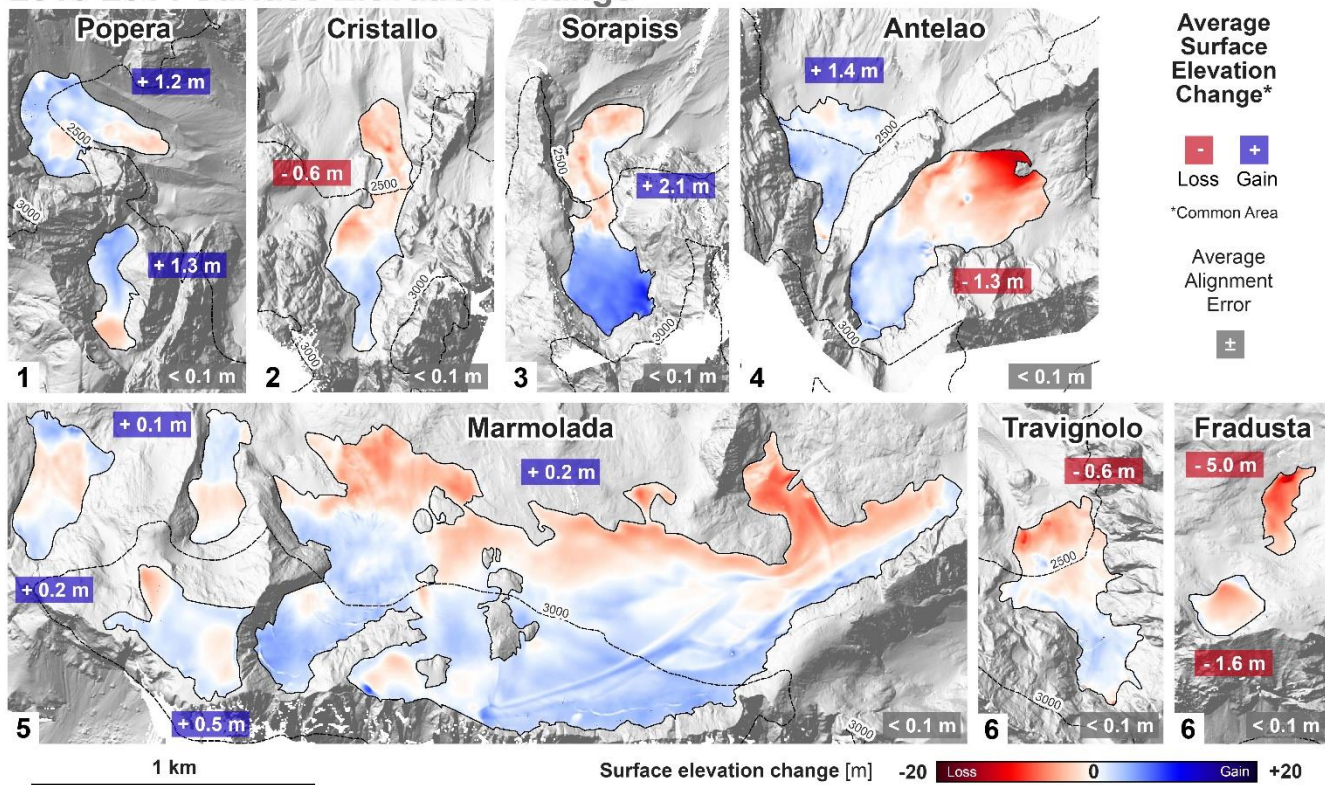

25 **Figure S3. Surface elevation change (m) measured across the Dolomites glaciers from 2010 to 2014. Average surface elevation change is reported for every glacier using common area.**

## 2014-2023 Surface Elevation Change

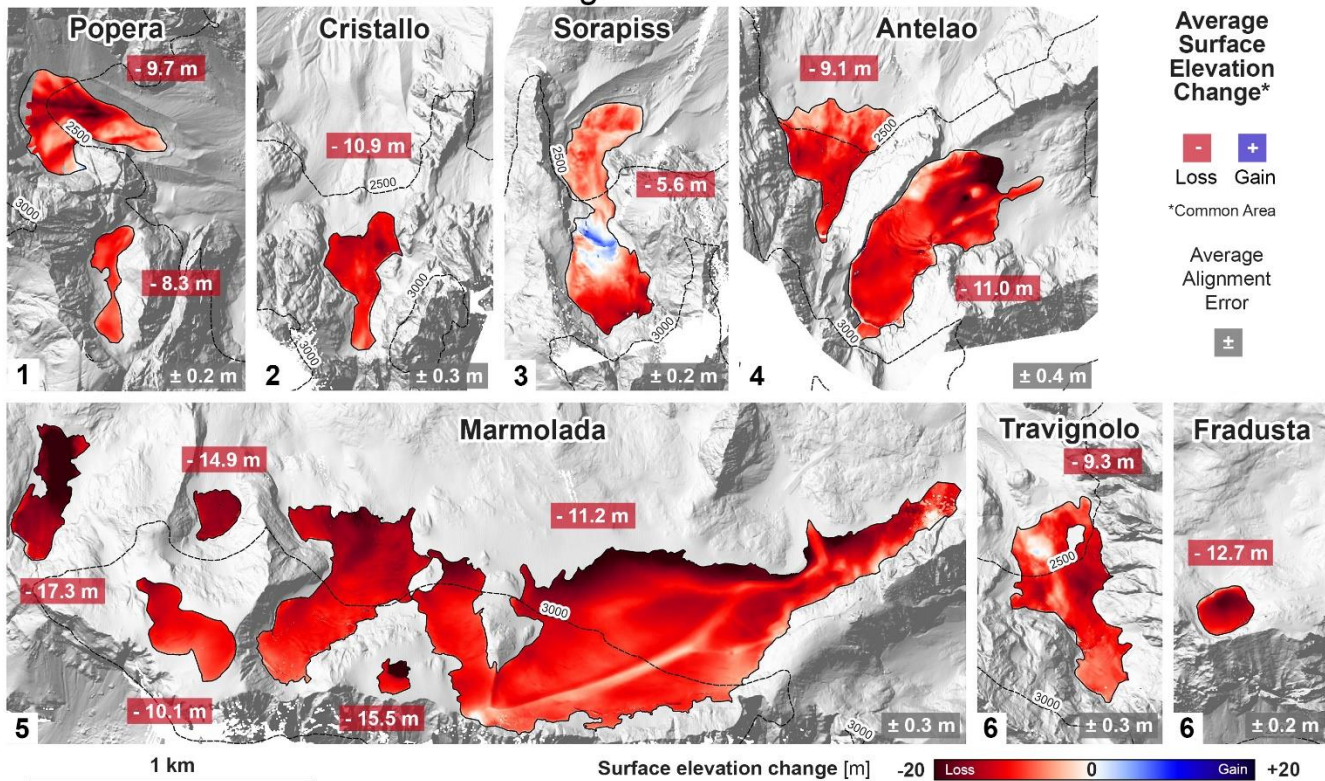

Figure S4. Surface elevation change (m) measured across the Dolomites glaciers from 2014 to 2023. Average surface elevation change is reported for every glacier using common area.

30

35

40

| Area ID               | Year | Date     | Photos | Resolution<br>[m/pix] | Tie<br>Points | Dense Cloud<br>points | GCP<br>number |
|-----------------------|------|----------|--------|-----------------------|---------------|-----------------------|---------------|
| 1 (Popera)            | 1992 | 21 Aug.  | 10     | 0.88                  | 61,444        | 10,329,170            | 6             |
| 1 (Popera Alto)       | 2023 | 12 Sept. | 144    | 0.05                  | 99,047        | 63,057,487            | 12            |
| 1 (Popera Pensile)    | 2023 | 12 Sept. | 66     | 0.14                  | 13,634        | 11,108,717            | 12            |
| 2 (Cristallo)         | 1992 | 21 Aug.  | 6      | 0.87                  | 28,503        | 17,319,719            | 6             |
| 2 (Cristallo)         | 2023 | 24 Sept. | 218    | 0.13                  | 94,549        | 50,806,741            | 12            |
| 3 (Sorapiss)          | 1980 | 23 Jul.  | 11     | 0.91                  | 45,642        | 2,482,055             | 6             |
| 3 (Sorapiss)          | 1992 | 20 Aug.  | 12     | 1.01                  | 133,237       | 12,785,764            | 15            |
| 3 (Sorapiss)          | 2023 | 9 Sept.  | 177    | 0.11                  | 47,987        | 30,558,608            | 12            |
| 4 (Antelao)           | 1980 | 25 Jul.  | 7      | 1.57                  | 109,269       | 10,832,894            | 8             |
| 4 (Antelao)           | 1992 | 19 Aug.  | 7      | 0.65                  | 51,292        | 17,122,069            | 13            |
| 4 (Antelao)           | 1999 | 14 Oct.  | 4      | 0.83                  | 45,538        | 14,662,362            | 17            |
| 4 (Antelao)           | 2010 | 21 Sept. | 7      | 0.41                  | 233,167       | 44,645,484            | 22            |
| 4 (Antelao Superiore) | 2023 | 10 Sept. | 553    | 0.06                  | 729,420       | 192,905,021           | 12            |
| 4 (Antelao Inferiore) | 2023 | 10 Sept. | 138    | 0.15                  | 23,018        | 23,174,756            | 12            |
| 5 (Marmolada)         | 1982 | -        | 17     | 1.50                  | 196,459       | 5,005,926             | 10            |
| 5 (Marmolada)         | 1992 | 19 Aug.  | 12     | 0.85                  | 64,420        | 16,352,851            | 6             |
| 5 (Marmolada)         | 2001 | 15 Oct.  | 13     | 0.65                  | 121,102       | 18,865,131            | 9             |
| 5 (Marmolada)         | 2012 | 20 Aug.  | 17     | 0.22                  | 292,028       | 126,682,805           | 14            |
| 5 (Marmolada)         | 2023 | 10 Oct.  | 250    | 0.35                  | 23,053        | 61,140,047            | 12            |
| 6 (Pale di S.M.)      | 1982 | -        | 32     | 1.59                  | 448,348       | 35,196,925            | 13            |
| 6 (Pale di S.M.)      | 1992 | 9 Aug.   | 28     | 0.71                  | 494,427       | 45,856,617            | 18            |
| 6 (Fradusta)          | 2001 | 15 Oct.  | 16     | 0.74                  | 210,548       | 25,732,223            | 16            |
| 6 (Travignolo)        | 2023 | 30 Sept. | 130    | 0.09                  | 43,916        | 31,107,078            | 12            |
| 6 (Fradusta)          | 2023 | 30 Sept. | 71     | 0.06                  | 30,193        | 25,419,814            | 12            |

45

**Table S1. Structure from Motion export report and dates divided by areas (see Fig. 1 for reference): Popera (1), Cristallo (2), Sorapiss (3), Antelao (4), Marmolada (5), Pale di San Martino (6); years of aerial acquisition and number of photos processed per year; Ground Resolution; Tie Points of the first alignment phase; GCP number used in the SfM pipeline, sometimes some of them have lately been excluded as not recognizable with precision in the aerial photos; RMSE error in m for Z only and XYZ (total) as computed by Metashape for the entire area, including poorly covered borders where photo coverage is less high (see Fig. S1).**

50

| Glacier                  | Area [km <sup>2</sup> ] |         |           |      |      |
|--------------------------|-------------------------|---------|-----------|------|------|
|                          | 1980-82                 | 1991-92 | 1999-2001 | 2010 | 2023 |
| Popera Alto              | -                       | 0.11    | -         | 0.10 | 0.10 |
| Popera Pensile           | -                       | 0.05    | -         | 0.05 | 0.03 |
| Cristallo                | -                       | 0.19    | -         | 0.11 | 0.06 |
| Sorapiss Occidentale     | 0.27                    | 0.19    | -         | 0.18 | 0.17 |
| Antelao Superiore        | 0.31                    | 0.28    | 0.25      | 0.24 | 0.19 |
| Antelao Inferiore        | 0.20                    | 0.16    | 0.13      | 0.11 | 0.09 |
| Marmolada <sup>(a)</sup> | 2.52                    | 2.28    | -         | 1.64 | 1.00 |
| Travignolo               | 0.24                    | 0.23    | -         | 0.17 | 0.14 |
| Fradusta <sup>(a)</sup>  | 0.27                    | 0.24    | -         | 0.09 | 0.03 |

**Table S2. Areas of the Dolomites glaciers during different intervals (km<sup>2</sup>). <sup>(a)</sup> Marmolada and Fradusta Glaciers are treated as one even after segmentation.**

| Glacier              | Total Ice Mass Loss [Mt]              | % of the Total |
|----------------------|---------------------------------------|----------------|
|                      | Entire Period available in this study | Dolomites Loss |
| Popera Alto          | 0.95                                  | 1.6            |
| Popera Pensile       | 0.43                                  | 0.6            |
| Cristallo            | 1.36                                  | 2.1            |
| Sorapiss Occidentale | 5.08                                  | 5.3            |
| Antelao Superiore    | 6.07                                  | 7.9            |
| Antelao Inferiore    | 3.57                                  | 4.0            |
| Marmolada            | 54.41                                 | 65.7           |
| Travignolo           | 4.37                                  | 5.5            |
| Fradusta             | 6.86                                  | 7.3            |

**Table S3. Total ice mass loss (Mt) during the observation period available in this study and % of the dataset.**
