# Supplementary material for: The Glaciers of the Dolomites: last 40 years of melting
Source: Copernicus journal article supplement (doi:10.5194/egusphere-2024-1357), 2024-06-18
Supplement: Supplementary file [file egusphere-2024-1357-AC1-supplement.pdf]

1 We have replied to the comments in blue.

## 2 **The Glaciers of the Dolomites: last 40 years of melting - Securo et al., 2024**

3 The authors present a comprehensive overview of the state of glaciers in the Dolomites including detailed  
4 assessments of glacier volume and mass change for the main remaining glaciers in the region. They provide an  
5 informative discussion of the observed glaciological changes in the context of local climate and topography and  
6 contrast the evolution of glaciers in the Dolomites with glaciers in other European regions. As the authors point  
7 out, glacier change data from the Dolomites is sparse (by Alps standards) and this work is a valuable contribution  
8 towards a quantitative understanding of glacier change in this region over the last ~40 years.

9 The authors highlight the importance of local, mostly topographic factors for the evolution of very small glaciers  
10 and the need for continued monitoring to better understand the possible future trajectories of these features. I  
11 agree with this. The 3D visuals are very cool and will be valuable assets in outreach activities.

12 I have some questions and comments which I hope can be addressed to improve the overall clarity of the paper.  
13 My impression is that the authors probably have everything needed to do this and it is a matter of providing  
14 additional explanations or changing the way some things are presented, rather than adding to or changing the  
15 analyses. My main points are below, the following brief notes are mostly just small quibbles I had while reading.  
16 I feel like some editing for more concise language would be beneficial but this is of course somewhat subjective.

### 17 **Main questions/comments:**

#### 18 **Surface change computation and treatment of errors**

19 The section in the methods dealing with this is a bit fuzzy and I find it hard to follow at times. The error in surface  
20 elevation change is stated to depend on lidar accuracy, alignment between the point clouds, and a distance  
21 uncertainty. The lidar accuracy is “not considered” (L163) because “relative distances” are used. I am unsure what  
22 the reasoning for this is. If I understood this section correctly the authors are comparing all other data to the  
23 2010 lidar (L158), but this does not appear to explain why the vertical accuracy of the lidar is not a relevant factor  
24 (?) Are you only looking at the horizontal accuracy? If so, why?

25 It's correct that we are comparing all the data to 2010 LiDAR because is the best available dataset so far. Although  
26 it is of a much smaller magnitude than the alignment error, at least in older reconstructions, it is necessary as  
27 suggested that all errors and their propagation are considered. In the revised version we will therefore consider  
28 all errors and how they combine into overall accuracy: alignment error from the point clouds manual alignment,  
29 lidar error from the surveys used as ground control points source and distance uncertainty coming from the M3C2  
30 measurements.

31 I would also like more explanation of the process mentioned in L158: “Every comparison included 2010 LiDAR  
32 data and has never been done using two historical SfM-point clouds at a time, to reduce possible sources of  
33 error.” The results show surface elevation change values for various time steps before and after 2010. How were  
34 these generated if everything is compared to 2010? I do not see how comparing everything to 2010 first and then  
35 computing differences for other periods would cancel out the errors in the historical point clouds. I may have  
36 misunderstood what you did here but either way I think it requires some more explanation.

37 The comparisons to 2010 LiDAR only are done to have the most reliable source of data used for alignment  
38 estimation. Error is calculated outside of the glacierized area so it's more robust if we use the best dataset as  
39 reference. The subsequent calculation for different timesteps are done just by subtraction.

40 Perhaps some sort of diagram showing the processing steps to arrive at surface elevation change for different  
41 time periods would help, or just a more structured explanation.

42 We had initially prepared a diagram showing all the processing steps which we have lately chosen to remove.  
 43 Looking at the methodology now and considering both reviewer comments we think that it's better to integrate  
 44 that image in the supplementary materials. See Fig. R1. Considering the current manuscript length and the  
 45 suggestion coming from Anonymous Referee #2 to shorten it, we think that Fig. R1 should not be in the main  
 46 manuscript.

47

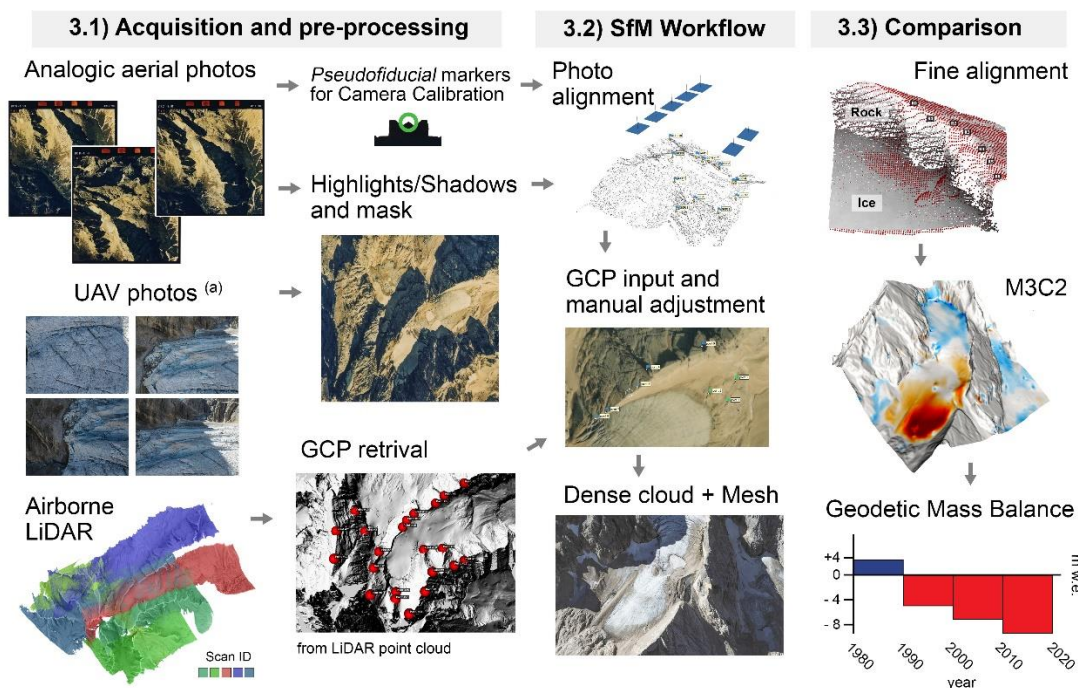

48

49

Figure R1. Summary of the data processing proposed to be integrated in the Supplementary Materials.

50

51 In the results (L206) it is stated that “Higher accuracy and precision ( $E_{AL}$  0.1-0.3 m) were obtained” for the more  
 52 recent years. Since the alignment error is considered the main source of uncertainty (this is my understanding  
 53 based on the methods section) it would be interesting to see these values for the historical data as well and to  
 54 include some more information on how this error was determined. Can you quantify the total error of the volume  
 55 change data for the different time steps?

56 Higher accuracy and precision are reported for LiDAR-to-LiDAR comparisons (i.e., 2010-2014) and for UAV-to-  
 57 LiDAR comparisons (i.e., 2010-2023) which are based on more robust data. The alignment error is visible for all  
 58 comparisons in Figure 4-5. Error treatment will be implemented, see answers to comments above.

59 The alignment error between historical-only (i.e., analogue based) comparisons are higher, but are not included  
 60 in our calculations as we compared everything with 2010 (see comment above)

61 **Glacier area**

62 The authors repeatedly refer to “common area” vs. “total area”. It is not entirely clear to me what they mean by  
 63 common area and how it differs from total area, nor did it become clear to me which year (or average) they used  
 64 for computations of volume and mass change. It would be beneficial to have a clear explanation especially of  
 65 “common area” early on in the manuscript (methods section). A bias related to usage of different areas is  
 66 discussed later on and it is apparent that the authors are aware of the influence of glacier area on further  
 67 computations, so I think it is again just a matter of improving the clarity of how this is presented.

68 This publication may be of interest: Florentine C, Sass L, McNeil C, Baker E, O’Neel S. How to handle glacier area  
69 change in geodetic mass balance. Journal of Glaciology. Published online 2023:1-7. doi:10.1017/jog.2023.86

70 We refer to common area as the area in common between the two timesteps considered in each comparison;  
71 while total area is what in Florentine et al. (2023) is defined as fixed maximum glacier area. i.e., the oldest year  
72 area of each comparison. We agree with the reviewer that this needs to be specified clearly in the text adding  
73 also the proposed reference. As pointed out in Florentine et al. (2023) using temporally resolved areas in geodetic  
74 mass balance studies is more robust, as we have done for each single comparison. Unfortunately, we cannot add  
75 intermediate timesteps between the one already in use in this study because of the lack of data in between

76 Note that the glacier area is also related to overall uncertainties. The uncertainty in volume change is a function  
77 of the uncertainty in surface elevation change and uncertainty in the area. Neither of these factors seem to be  
78 included in the uncertainty estimate for the mass change given in the results, which appears to be based only on  
79 the uncertainty of the density conversion. I understand that it may not be possible to fully quantify the  
80 uncertainty, but it would be good to at least mention this and explain that challenges related to exact area  
81 delineation (which you mention) also affect volume and mass change estimates. Note the large impact of area  
82 on uncertainties shown e.g. in Hugonnet et al 2021. (extended data Fig 5).

83 We will provide a more solid error evaluation in the revised version of the manuscript, considering the error  
84 propagation and the total error also in the mass balance calculation. As per the current version it is true that  
85 the only density conversion factor is considered as source of error for mass balance calculation.

86 The impact of area on uncertainties is big in such large-scale studies as Hugonnet et al. (2021) but in this  
87 specific case is less impactful as we have higher resolution data and, except for debris cover, we can map with  
88 precision the area of each glacier. We anyway agree that this should be specified better in the discussion

## 89 **Abstract**

90 L 8, L 50 and elsewhere in the manuscript: unmanned aerial vehicle  
91 Please consider using the neutral term “uncrewed aerial vehicle”

92 Agree and will update it, thank you

93 L 10: from 1980s to 2023

94 The 1980s and 1990s are frequently referred to as time periods throughout the text. I feel like more specific  
95 phrasing would be helpful for the reader. In the abstract and as you explain your workflow it would be good to  
96 know that, e.g. “1980s” refers to data from 1980 or 1982 as per table 2.

97 We agree with the proposed change, and we will integrate it with more specific periods whenever they are  
98 mentioned in the manuscript.

99 L10: ...33% of which between 2010-2023...

100 Missing word? → of which occurred (?) between 2010-2023

101 Yes, it was a mistake, thank you

102 L11 negative with a smaller amplitude

103 Consider changing to “less negative” for clarity

104 Agree, we will update this throughout the text

## 105 **Introduction**

106 29: valley bottoms

107 I think “valley floors” is the more common term for this

108 Agree, it will be changed to “valley floors”

109 L62: providing a description of the glaciers in the Dolomites that are still active,  
110 How do you define “active” glaciers?

111 Which glaciers are active in this case is taken from the last available inventory from Smiraglia et al. (2015), as  
112 mentioned in the text. e.g. L 104-109 and Fig. 1 caption

113 **Previous studies**

114 L69 No glacier in the area has mid or long-term mass balance dataset available  
115 Missing “a”? (has a mid or long-term mass balance dataset...)

116 Correct, our mistake

117 L88 Results show an area variation of approximately -50% from 1910 to 2009.  
118 Consider rephrasing for clarity: “...show an area loss of ...”

119 We will rephrase this and other similar sentences throughout the text

120 L91 and following

121 Consider restructuring for clarity. You could move the sentence starting with “also of great significance” to the  
122 end of the paragraph so that the sentence citing Serrano et al (2021) appears directly after the first use of the  
123 term ice patch. Why is the debris cover of great significance? You might state that it is abundant without using  
124 the word significance, which is often associated with statistical parameters.

125 Agree to remove the use of the word significance to avoid confusion and to move the sentences as proposed.  
126 The presence of debris cover glaciers is significant because gives an insight of the geomorphic evolution of the  
127 cryosphere in the Dolomites The paragraph will be as following:

128 “Among the 51 glacial bodies, 13 are classified as mountain glaciers (Table 1) while 38 are considered snow or  
129 ice patches (Smiraglia et al., 2015). When we use the term ice patch, we refer to the description of ice patch of  
130 glacial origin present in Serrano et al. (2011), which is more specific and relevant to the study area compared to  
131 the definition of dead ice. The presence of debris coverage is abundant or complete on 18 of the 51 inventoried  
132 glacial bodies.”

133 L106 Other Dolomites massifs that still host minor ice deposits devoid of any evidence of dynamics are not  
134 included in this work.  
135 What do you consider evidence of dynamics and how did you determine that none is present at these features  
136 compared to the nine you study?

137 The previous sentence is based on Smiraglia et al. (2015) inventory work, a proper analysis of this is not  
138 included in this work.

139 We will specify and add Smiraglia et al. (2015) citation in the text

140 Table 1: state in the caption or in the table for which year the area value is valid. Same year as the cited  
141 publication?  
142 Caption: Smiraglia and Diolaiuti → typo

143 The area for the Dolomites is valid for 2009, despite the work is from 2015. Also, the correct citation is Smiraglia  
144 et al. (2015) and not Smiraglia and Diolaiuti, our mistake. We will add the year and correct this

145

146

147 **Data and methods**

148 Table 2: 2010 and 2012 photos have been used only for visual reference and not for mass balance  
149 reconstructions.

150 Would this be an opportunity to compare results using the 2010 photo vs. the 2010 lidar and assess the  
151 difference in elevation change between the different methods/data sources?

152 [Even if this would be an interesting proposal, the problem is that 2010 surveys do not match in date and we](#)  
153 [have these kind of data only for one location \(Mt. Antelao\). Our proposal is therefore to improve the error and](#)  
154 [uncertainties section \(see general comments\) without including this comparison in the work.](#)

155 L157: ...using common area with regards to different years.

156 Unsure how to interpret this - does this mean you used the same area value for all computations of geodetic  
157 mass balance? Which area value (from which year) did you use?

158 [We did not use the same area, but the common glacier area between each period. E.g. if the comparison is](#)  
159 [2010-2014, we used their common area. Note that we have still reported both common and total area in the](#)  
160 [surface elevation change in Fig. 4 and Fig. 5](#)

161 L157:

162 Every comparison included 2010 LiDAR data and has never been done using two historical SfM-point clouds at a  
163 time, to reduce possible sources of error. Does this mean you compared every other year to 2010? See general  
164 comment above.

165 [Yes, we compared every other year to 2010. See comments above.](#)

166 L163:  $\pm 0.12\text{m}$  I am assuming this refers to vertical accuracy? Consider clarifying In this study, our comparisons  
167 were done using relative distances; therefore, it may not be considered.

168 I don't understand what you mean here. Are you saying uncertainties in the lidar measurements are not  
169 considered? Please clarify why not.

170 [It was unclear and as mentioned above this part will be implemented with a more robust accuracy estimation.](#)  
171 [All errors and their propagation will be now considered in the revised version of the manuscript](#)

172 EM3C2 was available as a direct output of the algorithm (i.e., distance uncertainty), and considering our dataset  
173 was negligible compared to the  $E_{AL}$ .

174 So  $E_{AL}$  was the main error source? Can you quantify the relative contribution of the different errors?

175 [Yes,  \$E\_{AL}\$  was the main error source. As commented above we will provide a much more comprehensive](#)  
176 [evaluation of all errors and error propagation. We will also quantify the relative contribution of the errors](#)

177 L170 imageries → imagery

178 [Our mistake, will change it to imagery](#)

179 **Weather station network**

180 L180 Additionally, years with missing data exceeding 5% of the accumulation (November to April) or ablation  
181 (June to August) season. Unusual definition of accumulation and ablation season, please explain the reasoning  
182 behind this. What happens in the missing months? (May, September, October)

183 [Please, see comment "L199-L202"](#)

184 L182 This was implemented at the level of individual AWSs, ensuring the availability of data for each year after  
185 averaging across all stations

186 Why average over all of them? If the goal is to get one T&P time series for the region, consider leading with  
187 that.

188 [The study area is small and individual stations do not show diverging trends among each other. While,](#)  
189 [averaging among the stations allow us to have a more complete regional timeseries](#)

190 L183 All the time series begin between 1985 and 2001 and end between 2020 and 2022 Does this mean that  
191 none of the time series extend beyond 2022?

192 [Yes they do, but when preparing the manuscript we stop to 2022 because more recent data were still not](#)  
193 [available from the regional environmental agency. Furthermore, the study area is small and individual stations](#)  
194 [do not show diverging trends among each other. Averaging among the stations allow us to have a more](#)  
195 [complete regional timeseries](#)

196 L189 where xa is either the total precipitation during the accumulation season (for the precipitation SAI, Pr SAI),  
197 and the mean... Should this be “or the mean” ?

198 [Yes, it is “or”. Thank you](#)

199 L191: The accumulation and ablation seasons were defined according to local climatology  
200 Please specify what this means.

201 [\(Reply here refers also to comment to L180\)](#)

202 [Nov-Apr is the time during which snow monitoring stations show increasing snow on the ground. From May the](#)  
203 [mean snow on the ground start decreasing in all the snow monitoring stations. Dolomite glaciers are located at](#)  
204 [lower altitudes compared to the Alpine average; therefore we used a shorter accumulation season.](#)

205 L191: Finally, SAI values were spatially averaged, providing unique Pr and T SAI values for the entire region  
206 Does “spatially averaged” mean you produced some kind of gridded data set or is this simply one averaged time  
207 series over all the weather station data? Please clarify

208 [It is the second one. “Finally, SAI values were averaged across all weather stations, resulting in unique Pr and T](#)  
209 [SAI time series representing the entire region.”](#)

210 L193: The pre-processing applied to AWS data may result in an underestimation of total precipitation and  
211 therefore of the Pr SAI.  
212 Why? What part of the preprocessing leads to underestimation?

213 [Due to the presence of missing data and the fact that years with more than 5% of missing data during the](#)  
214 [accumulation or ablation season were excluded from the analysis.](#)

215 L198 collect a datum  
216 Consider rephrasing → record a value

217 [OK, thank you. We will change it to “record a value”](#)

218 L200: Using this data, we reconstructed the October to June snow depth on the ground for the most relevant  
219 years of our study (1982, 1992, 2010, 2014, 2023).  
220 Reconstructed as in you averaged over October to June for the given years? Or does the reconstruction involve  
221 something more complex?

222 [We have changed “reconstructed” with “show”. The data we present here are daily snow on the ground as](#)  
223 [recorded by the snow monitoring stations.](#)



224 L202: Additionally, we calculated the October to June snow depth on the ground averaged over the whole time  
225 frame for each station as well as the total annual snow accumulation.

226 Could you explain your reasoning for using October to June average snow depth? Wouldn't the snow depth at  
227 the end of the accumulation season (late spring) be a more relevant metric?

228 We show the Oct to Jun (data are every 30 min or day according to the station) trend. In this way it is possible  
229 to see the snow at the end of the accumulation season as well as the whole of annual trend. We rephrase the  
230 sentence to make it clearer: "Additionally, we calculated the October to June snow depth on the ground  
231 averaged over the five reference years for each station, as well as the total annual snow accumulation from  
232 1980s to 2023."

## 233 **Results**

234 L206: Higher accuracy and precision (EAL 0.1-0.3 m) were obtained...  
235 What does the EAL 0.1-0.3 m value represent? (accuracy or precision? Which years? What are the values in the  
236 years where lower accuracy(?) was obtained?)

237 We will specify the highest and lowest accuracy and also the period considered in the revised version of the  
238 manuscript. These 0.1-0.3m  $E_{AL}$  values are referred to the recent comparisons (2010-2023) that do not include  
239 analogue imagery. See also updates listed in the general comments answers.

240 L207 Out of the 9 glaciers analysed, Sorapiss Occidentale, Antelao, Marmolada and Pale di San Martino areas  
241 were reconstructed starting from the 1980s while Popera and Cristallo reconstruction begins in the 1990s  
242 State the exact years, 1980s and 1990s is vague

243 Agree, we will state the exact periods.

244 L214:

245 In 1980s and 1990s the Dolomites glaciers were larger in number, with several of them that have now  
246 completely melted, turned into permanent ice patches without apparent ice dynamics and heavily buried by  
247 debris.

248 Consider rephrasing for clarity. Something like: In the 1980s and 1990s, there were more glaciers in the  
249 Dolomites, some of which have completely melted or turned into debris covered permanent ice patches  
250 without apparent ice dynamics.

251 Agree, thanks for the feedback.

252 L217 Relative area reductions are not similar across all glaciers  
253 State min max range of area reduction to show variation?

254 Agree, it's useful to present quantitative insights. Smallest area reduction is 9.1% in Popera Alto glacier while  
255 largest is 88.9% in Fradusta glacier. Areas are also shown for all timesteps available in Table S2.

256 L219: topographic bounding  
257 Consider explaining this term

258 Instead of using this term we will use "bounded by steep topography" to be clearer

259 L226: for common and total glacier area

260 Please explain what you mean by common and total area. Is this stated somewhere?

261 See general comment "Glacier Area". We will add a specific explanation that was now missing.

262 L226: Due to the impossibility of retrieving enough data for years 1999 and 2001, we considered the period  
263 from 1990s to 2010 as a unique time frame, instead of calculating the metrics at a decadal frequency. The

264 average cumulative surface elevation change (Table 3) was calculated for three periods: 1980s with -5.21 m,  
265 1990s-2010s with -14.09 m and 2010s with -9.31 m.  
266 Does “unique time frame” just mean you used a longer time step? I think rephrasing would help clarify this,  
267 something like: “The average cumulative surface elevation change (Table 3) was calculated for three periods:  
268 1980s with -5.21 m, 1990s-2010s with -14.09 m and 2010s with -9.31 m. Due to lack of data in 1999 and 2001 it  
269 was not possible to resolve the 1990s-2010 period at decadal frequency.”

270 [We agree with the proposed rephrasing that avoids potential misunderstanding.](#)

271 L241 The highest absolute losses, corresponding to almost 35 m, are reached in the area involved in the ice  
272 avalanche that happened in a detached part of Marmolada Principale, on 3<sup>rd</sup> July 2022, as shown by the Kernel  
273 Density plots of surface elevation loss (Fig. 5b)  
274 Can you mark this in the figure? I am unsure where I can see this in Fig 5b.

275 [As this is under “Marmolada Collapse” label in Fig. 5b, we will add a reference to it in the text to help the  
276 readers finding it in the figure. The same label is present also in the map \(Fig. 5a\) so it should be easy to find it.](#)

277 L243 The Fradusta Inferiore Glacier was not included in the common area measurements as it had already  
278 disappeared before 2023 surveys took place.  
279 Again, what exactly is common area?

280 [See comments above on Glacier Area. More explanations will be added in the methods.](#)

281 L246 On that glacier a rise of more than 10 m has been observed close to a wide serac whose presence is  
282 possibly related to a small surge induced by a recent rockfall (Fig. 5a) in the accumulation area as well as by  
283 internal glacier dynamics  
284 Interesting! If possible, consider marking this feature in the figure

285 [This feature is already shown in Fig. 8a, b and more text is present in the Discussion section.](#)

286 L248 This is well visible in Fig. 6a,  
287 Should this be Fig 5a?

288 [You are correct, our mistake](#)

289 L251 ff and Table 4:  
290 Do these uncertainties refer only to the uncertainty originating from the density conversion, or does this also  
291 include uncertainties in area and volume?

292 [Uncertainties in area and volume were not present and will be updated in the revised version of the  
293 manuscript. See general comment on “Surface change computation and treatment of errors”.](#)

294 L256 Our results show that the use of a fixed maximum glacier area in the geodetic mass balance leads to an  
295 underestimation of the m. w.e. loss when compared to common area calculations. In our case the bias  
296 introduced by total area is between -1% and -31% of the common area mass balance, depending on the site  
297 and considered period. There are some cases of decadal comparison (1980s-2010 in Cristallo, Antelao Inferiore  
298 and Marmolada) where total glacier area produced larger mass balance losses than calculations using common  
299 area.  
300 I am still unsure about the differences between “fixed maximum glacier area” (this term is used for the first  
301 time here), common area, and total area.

302 [See comments above on Glacier Area. More explanations will be added in the methods.](#)

303 Table 4: (a) Sorapiss Occidentale values have been corrected removing the positive elevation gain portion for  
304 2010-2023.



305 Why did this need to be corrected? Did you simply delete all positive values or was there some other  
306 correction? You measured the positive elevation change and suggested that this was due to a rockfall/surge  
307 process - what is the argument for removing the elevation gain when that is what your analysis shows?

308 We have removed the positive elevation change values (simply removing values > 0) from Sorapiss glacier to try  
309 to get a more realistic estimation of the mass balance rate. Although this is not the most precise evaluation, we  
310 think is still better than showing the mass balance rates including that positive values.

311 We agree that the positive change (in surface elevation change) measured should be shown, and that is why in  
312 Table 3 we did not apply any correction.

### 313 **Climate data**

314 L266. Among the ten highest events, seven have occurred in the last 15 years (2007-2022).  
315 Consider rephrasing for clarity? highest → warmest

316 We would prefer to use “high-low” as we are actually writing about SAI and not T, even if high SAI means  
317 warmer T.

318 L269 The maximum Pr SAI has been calculated for 2014 with a value > 2, while 1996 is marked by the minimum  
319 value at -1.22.

320 Consider rephrasing for clarity, e.g.: Pr SAI was greatest in 2014 with 2.x and lowest in 1996 with -1.22.

321 Ok, thank you. We'll rephrase. “Pr SAI was greatest in 2014 with a value > 2 and lowest in 1996 with -1.22.”

322 L272 Temperatures have risen by 0.4-0.6 °C per decade since 1985, while precipitation showed an increase that  
323 lasted about 15 years from 1995, culminating in the extremely snowy year of 2014 (Fig. 6b). Fedaia station, the  
324 only one providing data since 1980, does not show any trend for the total snow accumulation (p-value = 0.61;  
325 Fig. 6c), however, increased extreme events can be observed in the last decade of its time frame. The other  
326 three snow monitoring stations exhibit slightly different patterns, demonstrating a higher frequency of snowy  
327 winters also in previous decades. Did you also look at station variability for T and P? How do you identify  
328 extreme events in the snow time series?

329 P and T trends among stations were similar. Furthermore, since the study area is quite small and none of the  
330 stations is on/adjacent a/to a glacier we preferred to use regional mean values. Extreme events are considered  
331 those events falling above the 95<sup>th</sup> percentile.

332 We will modify the text consequently: “The snow monitoring stations, do not show any trend for the total snow  
333 accumulation (p-values = 0.54-0.95; Fig. 6c), however, extreme events (above 95<sup>th</sup> percentile) were observed in  
334 2013 and 2014 for all the stations. “

335 Fig 6b: The dotted line is hard to see. I'm assuming the lines refer to hydrological year, i.e. 2023 refers to the  
336 2022/23 winter season. Consider stating this in the caption or legend.

337 We will modify the caption: “...for the same snow monitoring stations (c). The years shown in the plot refer to  
338 hydrological years, e.g. 2023 refers to 2022-23”.

### 339 **Discussion**

340 L295 In the Dolomites, a slight increase in winter snowfall has been observed at some high-altitude stations,  
341 such as Ra Vales site at 2620 m (Fig. 6)

342 How do you determine this increase? It is not really obvious from Fig 6c and there is no mention of this in the  
343 results.

344 This slight increase has been determined since 1993 using linear regression and is present in all the 4 stations,  
345 but more evident for the highest one (2620 m a.s.l.). Extending the linear regression from the beginning of the  
346 time series (i.e., 1980 and 1987) bring slightly different results, even with slightly negative values. We will add  
347 this to the result as it was absent and implement this part also in the discussion.

348 L296 unfavourable years conditions for glaciation prevailed  
349 Extra word? Delete “years”

350 Yes, it was a mistake

351 L302 Within Alpine mass balance records, the ablation season of 2022 results unprecedented.  
352 Missing word? (...results were unprecedented...)

353 Yes, we will correct it adding “were”

354 L305 According to such climatic evolution, the Dolomites are rapidly turning from being mountains hosting sites  
355 favourable to local glaciation, to areas where peri-glacial processes will progressively gaining importance.  
356 → gain importance

357 Agree, thank you for the correction

358 L317 Dolomites glaciers mass balance rates are half of the average RGs rate during the last 13 years  
359 Interesting!

360 L334 stabilise the dynamic of some glaciers of the Dolomites  
361 Do you actually mean dynamic as in movement or something else? Consider rephrasing

362 We meant that extremely snow winters like 2014 can stabilize the mass balance of the Dolomites, as glaciers, as  
363 shown in the 2010-2014 comparisons. The sentence needs to be rephrased to avoid confusion.

364 “The occurrence of extremely snowy winters can still result in an increase of volume for some glaciers in the  
365 Dolomites. This is evidenced by our data from at the end of summer of 2014, when 5 glaciers of the Dolomites  
366 (Popera, Sorapiss, Antelao Inferiore, Marmolada) have recorded a positive cumulative mass balance since  
367 2010.”

368 Fig 7: Cool figure! I’d be interested in seeing how the WGMS annual product compares to your values for the  
369 Dolomiti glaciers (just an idea, the figure is informative as is and this is not needed for the manuscript)

370 <https://cds.climate.copernicus.eu/cdsapp#!/dataset/derived-gridded-glacier-mass-change?tab=overview>

371 We have tried to compare the values we had with WGMS annual product (see Fig. R2). 2023 is missing from the  
372 available WGMS annual gridded products and we don’t think that considering the high local variability of our  
373 very small glaciers it is worth adding it to the figure or the paper.

374 Fradusta (-12.8 m w.e.), Travignolo (-8.5 m w.e.) and Marmolada (ranges between -14.5 and -8.4 m w.e.) are in a  
375 WGMS cell of -6.76 m w.e.

376 Antelao Superiore (-10.0 m w.e.) and Inferiore (-6.4 m w.e.) are in a WGMS cell of -4.27 m w.e.

377 Sorapiss (-3.8 m w.e., with correction, see comments above), Cristallo (-8.6 m w.e.), Popera Alto (-7.4 m w.e.)  
378 and Pensile (-5.8 m w.e.) are in a WGMS cell of -10.85 m w.e.

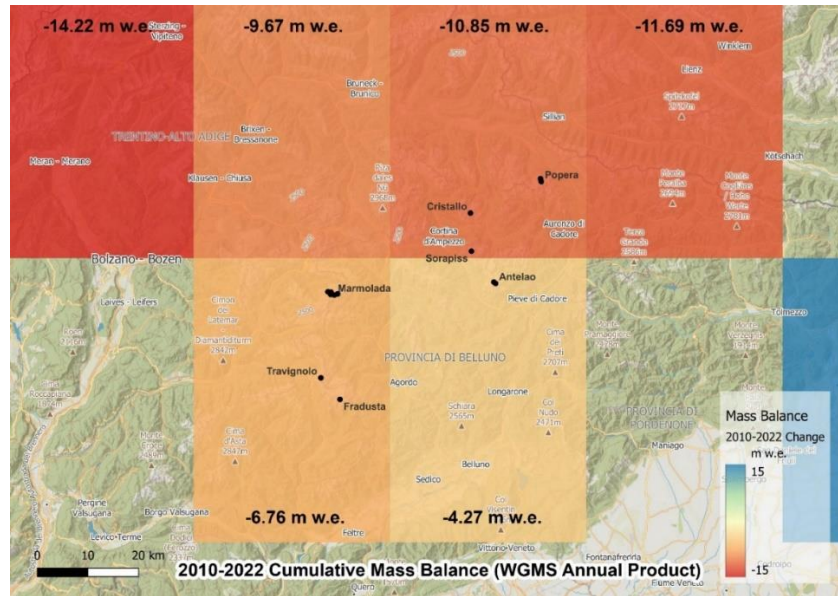

Figure R2. WGMS Annual Product Grid sum from 2010 to 2022 and position of the analyzed glaciers.

379

380

381

382 L360 most representative

383 If it is the largest it is not the most representative in terms of size. Consider removing this.

384 Correct, we will remove the “... and most representative ...” as it’s not correct. We meant it’s the most

385 representative for Alpine scale or WGMS comparisons and of course in eventual weighted means.

386 L374 In this study we used the surface lowering observed during the last 13 years and direct observations on

387 site to assess the glaciers end.

388 I would like to read this earlier, e.g. in the methods.

389 Agree, this sentence will be put in the methods at L141 and slightly modified to fit in the paragraph. We will add

390 also a sentence to specify how glaciers area have been mapped as also requested by R2. As per now is only

391 mentioned in L141.

392 L397 In the late 1950’s the Dolomites were hosting 33 glaciers, of which only 9 are still active;

393 Define somewhere what you mean by active

394 As mentioned in the comments above here we refer to Smiraglia et al. (2015) Italian inventory. We will specify

395 this “... of which only 9 are still considered mountain glaciers (Smiraglia et al., 2015).

396 L402 A few glacial bodies may eventually shift from glacial to periglacial, thus becoming more resilient in a  
397 warming climate.

398 There seems to be an ongoing discussion about how and whether glacial features can turn into periglacial  
399 features (e.g. discussion comments here: [https://tc.copernicus.org/articles/18/1669/2024/tc-18-1669-2024-](https://tc.copernicus.org/articles/18/1669/2024/tc-18-1669-2024-discussion.html)  
400 [discussion.html](https://tc.copernicus.org/articles/18/1669/2024/tc-18-1669-2024-discussion.html) ). Perhaps rephrase this sentence to avoid ambiguity. You could focus on the processes that

401 would make the ice features more resilient without classifying them as glacial or periglacial.

402 We partly agree on this, despite in the Dolomites region these glacial-periglacial shift appears as an ongoing  
403 phenomenon (see e.g. Seppi et al., 2014). It is anyway a good idea to rephrase the sentence to avoid ambiguity
