# Supplementary material for: The Glaciers of the Dolomites: last 40 years of melting
Source: Copernicus journal article supplement (doi:10.5194/egusphere-2024-1357), 2024-06-18
Supplement: Supplementary file [file egusphere-2024-1357-AC2-supplement.pdf]

1 We have replied to the comments in blue.

2 **Review of ‘The Glaciers of the Dolomites: last 40 years of melting’** By Securo, Andrea and others.

3 Securo and authors present a multi-decadal estimation of surface elevation change for small glaciers in the  
4 Dolomites, Italian Alps. Their geodetic data used in this study consists of aerial photographs, uncrewed aerial  
5 vehicles (uavs) and LiDAR data. This data and their analysis indicate high rates of glacier mass loss with the  
6 Marmolada Glacier accounting for about  $\frac{2}{3}$  of the region’s volume loss.

7 Overall, I found this manuscript to be generally well written with methods partially described. The presented data  
8 generally supports the conclusions made by the authors. However, like many papers, some clarification of the  
9 methods is needed, the English can be substantially improved, and manuscript could be shortened. Below, I  
10 outline my major points about the paper and follow these with technical comments.

11 MAJOR POINTS:

12 1. Methodology and error analysis needs further description - Given that the authors are using multiple geodetic  
13 datasets to calculate volume (and mass) change, the methods section should clearly lay out how the actual  
14 uncertainties are propagated to yield the total error budget and final uncertainties. If I understand it correctly,  
15 the authors obtained point clouds from all datasets, align these and then use M3C2 for the error analysis. There  
16 has been some discussion about the robustness of M3C2 as it assumes planar surfaces and could estimate  
17 significance of detectable change (e.g. <https://doi.org/10.1016/j.isprsjprs.2021.06.011>). I would like to see, for  
18 example, how the uncertainty over stable terrain changes due to slope. These are small glaciers in rugged terrain  
19 so their slopes will be steep. Also, are there assumptions made for missing data? How is this error source treated?

20 As reported in the technical comments and suggested by both Referees, we agree that the error analysis needs  
21 to be better clarified and improved in a few points, especially regarding error propagation which can be done  
22 better. We do not think section 3.3 needs further addition, it is more about the clarity of the text and the approach  
23 used, that we will improve in the revised manuscript. We will consider all errors from LiDAR, point clouds  
24 alignment and M3C2 distance measurements in the surface elevation change measurements. See also comments  
25 from Referee #1.

26 These small glaciers are in rugged terrain and have high slope values, we agree with the Referee that M3C2  
27 uncertainty should be referred to areas with similar slope of the glaciers. And that’s why we have done that. We  
28 will write a few more details about it on the methodology. We used verticality (geometrical attribute in  
29 CloudCompare) to measure the slope of the glaciers and selected only areas with similar values on stable terrain  
30 to calculate the alignment error ( $E_{AL}$ ). We will implement the revised manuscript with more text and more  
31 information on how the uncertainty over stable terrain changes due to slope, as requested. This information  
32 specifically will be put in the supplementary materials.

33 In the case of completely missing data, we have not performed any kind of interpolation. This is mainly because  
34 the portions of no data are very small compared to the reconstructed areas and are assumed to be in line with  
35 the resulting average. We will specify better this in the reviewed manuscript. Just to be clear, missing data were  
36 present only in very small portions of Marmolada 1982-2010 and Antelao 1982-2010 (Fig. 4) and Popera Alto  
37 Glacier 2010-2023 (Fig. 5a). An additional part where noise in data was present is Marmolada Principale 2010-  
38 2023 (Fig. 5a). The influence of these voids in the final average result for surface elevation change is not relevant.

39 2. Manuscript needs to be shortened/tightened - I found the ‘Introduction and Previous glaciological research’  
40 sections to be long and would strongly advocate for merging the ‘Previous glaciological section’ with the Intro so  
41 that the total length of both sections is about  $\frac{1}{2}$  of what it currently is. Also, I think some of the tables could be  
42 moved to a supplement as most people rarely need to read each line of these tables (they are, however, useful  
43 to have if a reader needs them).

44 While we agree with reviewer 2 that the manuscript appears long in some of its sections, we do not agree with  
45 the proposal of shortening sections 1-2 by approximately 50%. In particular, the second chapter that deals with  
46 the previous glaciological research in the Dolomites was made because there are no previous recent work dealing  
47 with the evolution of these glaciers. We think it can be insightful and potentially useful, especially out of the  
48 Italian/Alpine community, to read and find a recap of the previously available glaciological research in the area,  
49 which often is not easy to find and is almost entirely written in Italian and only available through grey-literature,  
50 local chronicles, and regional reports. Therefore, we propose only some smaller shortenings to the introduction,  
51 without changing chapter 2. The only additional paragraph that repeats information between introduction and  
52 chapter 2 is from L40 (... In the 1960s, the surface of...) to L46, and will be removed.

53 One possible alternative option, on which we ask the editor's opinion since Referee #1 did not object to the length  
54 of the manuscript, is indeed to move the section on previous glaciological research in the Dolomites (Chapter 2)  
55 to Supplementary Materials.

56 3. Comparison to previous work - The authors do a commendable job compiling datasets for these small glaciers,  
57 but they should explicitly show how their results compare to those, for example, of Hugonnet and others (2021).  
58 The authors can download data for each of their glaciers (since each glacier has an RGI number this should not  
59 be a difficult task). How do their estimates and uncertainties compare to Hugonnet? This is an important test of  
60 the reliability of Hugonnet for small glaciers in this region (I would posit that perhaps the present study has better  
61 estimates for these small glaciers but I simply don't know). It would be good to examine this in some detail.

62 Hugonnet et al. (2021) work is certainly valuable and precise for larger glaciers, but in this specific study area the  
63 resolution is simply not enough to evaluate the surface elevation changes correctly as we did using a higher  
64 resolution dataset. As you can see from the figure below (Fig. R1) there is a different order of resolution (pixel  
65 size of Hugonnet et al. data is 100 m) between our calculations the one in Hugonnet et al. (2021), due to their  
66 much larger effort in terms of total area. Comparing our results with those would therefore not be useful and can  
67 be misleading, as shown in the example below.

68 We will add a sentence in the discussion about this issue as it can be valuable information. Possibly with future  
69 studies based on much higher satellite remote sensing imagery (e.g. Airbus Pleiades) this gap can be reduced,  
70 and the values can be compared. Furthermore, there is a problem with the difference in the timesteps of the  
71 comparison that do not match between our work and Hugonnet et al. (2021).

72

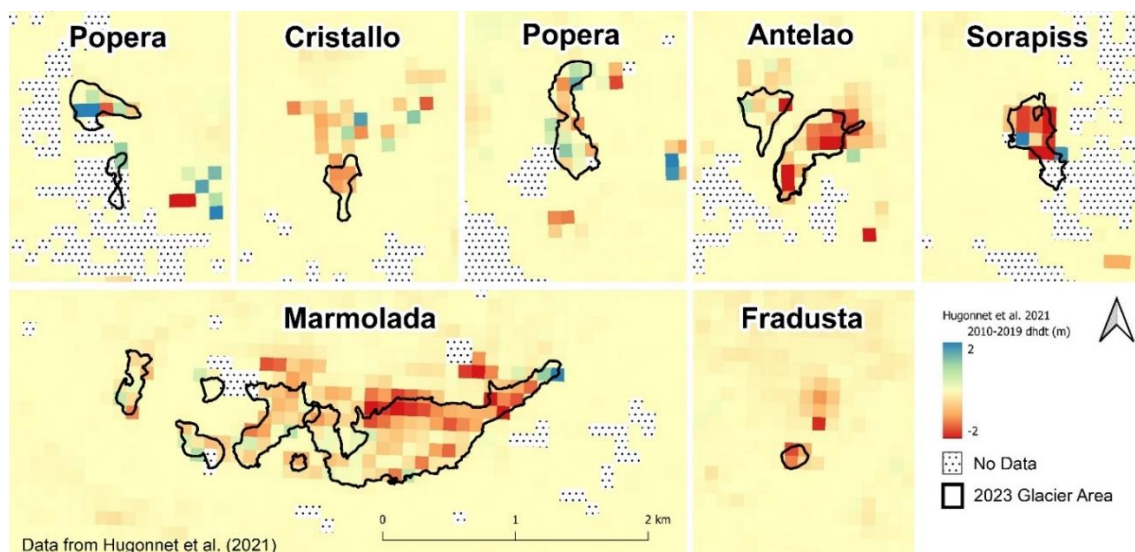

73

74

Fig. R1. Example of Hugonnet et al. (2021) surface elevation change dataset from 2010 to 2019 (m) in the Dolomites Glaciers.

75 4. Manuscript should be shortened. I found the length of the discussion section to be somewhat unbalanced with  
76 the length of the results section (the former is longer than the latter). I would recommend shortening the  
77 discussion section to balance in light of statements that can be backed up with results shown in the results  
78 section. Some of the figures/materials in the discussion seem, to me, to be more results and less discussion.

79 It should be noticed that the discussion are this long because of the first part regarding climate in the area

80 We agree regarding the fact that part of Discussion material can be moved to Results and will do that.

81 Furthermore, section 5.1 dealing with climate in the Dolomites region could be of less relevance considering the  
82 aims of the paper compared to 5.2, where the results are compared to WGMS reference glaciers. We will try to  
83 shorten all the three sections leaving more relevant parts only.

84 We can move Fig. 8 and eventually Fig. 9 to Results.

85 5. Terminology needs clarification - I would recommend that the authors consult the glossary for the standard  
86 definitions used in glacier mass balance ([https://wgms.ch/downloads/Cogley\\_etal\\_2011.pdf](https://wgms.ch/downloads/Cogley_etal_2011.pdf)) . There are multiple  
87 appearances of mass balance when the authors are referring to 'geodetic balance'.

88 We agree with reviewer 2 on this point, especially regarding the term "geodetic balance".

89 TECHNICAL COMMENTS:

90 Abstract:

91 'Use lowercase 'Alpine' unless it starts a sentence.

92 Pg 1, Line 3: This sentence isn't technically correct in light of Worldview or Pleiades (very high resolution)

93 Pg 1, line 11: 'between used for two items, among for more than two'. Also use of 'amplitude' is vague

94 Pg1, line 13: replace 'areal reductions' with 'area loss'

95 Pg1, lines 13-15 - This sentence is out of place and likely not needed

96 P1, line 18: 'with greatest emphasis on regions of the world' - unclear what authors are referring to here.

97 We agree with Reviewer on the proposed corrections for Pg 1 and changes of the sentences of introduction

98 We will remove the sentence of L 13-15

99 Regarding L18 we mean that regions like e.g. the European Alps, and the Arctic global warming hotspots and here  
100 increased ice losses rates are reported. We can reformulate for more clarity as: "Glaciers worldwide have been  
101 losing mass at alarming rates over the past decades (Zemp et al., 2019; Hugonnet et al., 2021). This is particularly  
102 evident in regions where warming is occurring at a faster rate than the global average (Rantanen et al., 2022;  
103 ICCL, 2022)."

104 Pg 2, lines 25-33 - Authors could easily jettison this section to shorten first two sections that need to be put on a  
105 diet.

106 Agree on reduction despite this being the first paper dealing with this study area makes it hard to reach the  
107 proposed shortage of 50%. We think, as written in the general comments, that an overview of the previous  
108 glaciological research in the Dolomites is useful. Regarding these specific L25-33 we think they introduce the  
109 Dolomites region (to eventual people that don't know it) and specify why it's an important area. We will shorten  
110 the paragraph a bit, reducing it to 2 sentences.

111 Pg 2, line 50 (and throughout) - 'unmanned' is an outdated term these days. Typical use is 'uncrewed aerial  
112 vehicle'

113 [Will change the terminology throughout the text](#)

114 pg.3 , line 63. Unclear what authors mean with 'active' - deformation, ice flow?

115 [For active we mean that these have been classified as mountain glaciers in the latest available Italian glacier  
116 inventory \(Smiraglia et al., 2015\). We will specify it better in the text](#)

117 Section 2 - Shorten this section

118 [See general comments above on Section 2](#)

119 Figure 1. The figure could use a little bit of work. The inset (upper left) needs at least some lat/lon coordinates  
120 for a reader not certain where the Dolomites are. I was initially confused with the color of the glaciers and the  
121 colors of the geodetic datasets (numbers). Maybe change the color of glaciers to avoid confusion? (a) - replace  
122 'position' with 'location'

123 [We will improve the figure readability, and we will add coordinates and adjust the colors/labels as proposed](#)

124 Pg. 6, lines 115-118. Were these photos not available as photogrammetric scans? Also, it's too bad that the  
125 internal orientation (if available) information isn't used as that might help reduce overall error budget.

126 [Unfortunately, the photos used were not available as photogrammetric scans and internal orientation was not  
127 available either. These problems are also evidenced in the discussion. We will add in the sentence that also  
128 internal orientation was not available](#)

129 Pg, 6, lines 115-126. I had a hard time understanding how GCPs were collected and how they were used. This  
130 section should be revised to make it clear exactly what was completed and for which datasets.

131 [We agree this should be clarified better in the text and we will improve it. Perhaps Fig. R2 \(see below\) that will  
132 be put in the supplementary materials could be helpful for understanding the methodological steps more easily.](#)

133 [Ground Control Points have all been taken from 2010 LiDAR dataset, which I the best available so far, and used  
134 for all SfM processing. The entire procedure of retrieval of GCP was done in CloudCompare, while GCPs  
135 coordinates have been used in Metashape during SfM processing.](#)

136

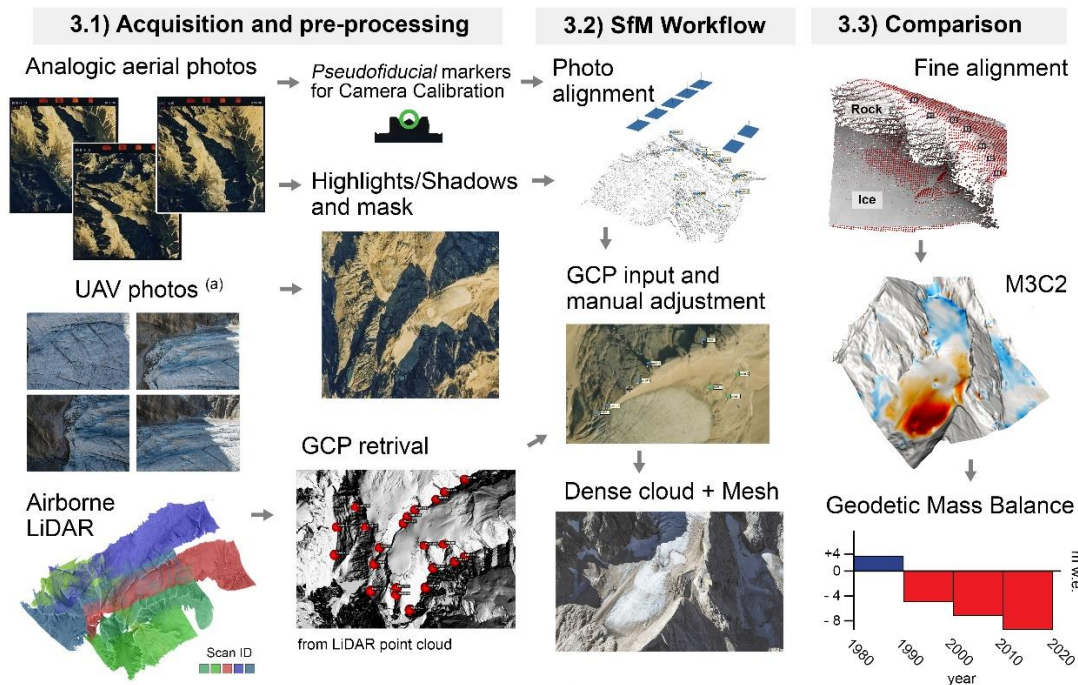

Figure R2. Summary of the data processing proposed to be integrated in the Supplementary Materials.

137

138

139

140 Pg. 8, lines 153-154. I'm surprised that there were only small areas of voids. Was hypsometric interpolation  
 141 attempted?

142 The areas of void were very small without hypsometric interpolation, as stated in the method we used Metashape  
 143 meshes instead of dense point clouds when the voids were too big to fill. Metashape in this processing does a  
 144 default linear interpolation and works only within a certain radius depending on the resolution of the point  
 145 clouds. From our visual inspection this does not introduce any change in the dataset and works as a simple linear  
 146 interpolation

147 We think that the areas of voids are this small because photos have a lot of details and are not shot from very  
 148 high altitudes, despite not having the photogrammetric scans. The areas of the glaciers with snow featureless  
 149 pixels or are not that impacting in the study area, at least not in these dataset

150 Pg 11, lines 210. Area change. How were areas of the glaciers digitized? Any uncertainty in area change? Unless I  
 151 missed it, planimetric mapping is not described in methods.

152 Areas were manually digitized but we can better explain the procedure especially in regard to the role of debris  
 153 in the area evaluation. For this reason, we propose to improve the current paper adding the presence of debris  
 154 in 2023 areas to current Fig. 3 to let the reader know where the glacier areas could be susceptible to major  
 155 uncertainties due to the debris cover

156 Pg. 11, lines 219: Unclear what 'topographic bounding' is. Surrounded by rugged terrain?

157 Yes, that's what we meant; we will specify better in the text

158 Pg. 11, lines 228-229: Uncertainties needed for these estimates.

159 Agree, see previous comments on the uncertainties improvement

160 Pg. 13 lines 215: Terminology needs to be changed to include term 'geodetic'



161 Agree, see answer to general comments 2 and 4, above

162 Figures 3, 4 - Generally well drafted, but uncertainties would be useful.

163 Uncertainty for area are harder to quantify. As stated above, we propose to implement the area figure with debris  
164 cover but without quantifying the uncertainty of this, lacking geophysical data. This problem is already specified  
165 in the discussion.

166 Uncertainty for surface elevation change (Fig. 4-5) are shown for each comparison in the bottom right corner  
167 (grey).

168 Tables 3, 4- I would recommend moving these perhaps to a supplement. Also it would be good to have a summary  
169 line for weighted mean (table 3). Does table 4's all glaciers line imply this is a weighted mean (by area)?

170 We agree with the Referee, and we suggest to move Table 3 to the Supplementary Materials. Table 4 in our  
171 opinion should stay in the manuscript.

172 Figure 5 - I think this is a well drafted figure, but I'm not fond of the color bar. It really should be a standard  
173 diverging color (red to blue). The dark ends for both red, blue are problematic for diverging data. Sorapiss Glacier's  
174 mid elevation I presume is debris covered? I would explain before it is brought up in the discussion. As stated in  
175 the major comments, I think some of the discussion and plots should be moved to results section.

176 The color bar is made with darker ends to improve the spatial visualization of largest changes, which would  
177 otherwise appear flat and not be distinguishable in the maps (see Fig. R3). The same color scale is used also in  
178 the previous Fig. 4 for the same reason. We have done some tests and can report here an example for Marmolada  
179 to show what we mean. Dark ends can be problematic, but they are still distinguishable especially in this case  
180 where the positive "blue" extreme (+ 20m) is not present on the map.

181 Regarding the debris cover, we think improving Fig. 3 with the current presence of debris cover in 2023 for all  
182 glaciers would help the overview of area change and current situation of the glaciers. Will produce a revised  
183 version of the Figure including debris cover. This should clarify also Sorapiss current debris coverage (visible also  
184 in Fig. 8b).

185 Regarding the Figures in the Discussion-Results sections, we think Fig. 8 can be moved to Results while Fig. 9 is  
186 more a subjective choice.

187

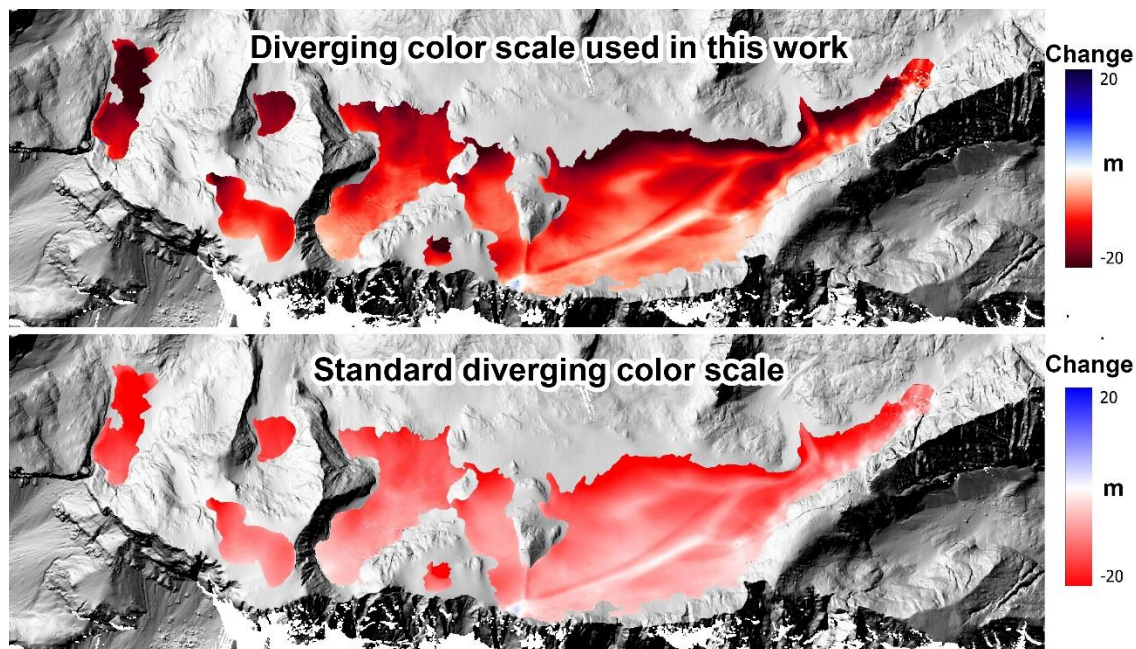

188  
189 **Fig. R3.** Example of the chosen diverging color scale with darker colors at the extremes and the standard diverging color scale.  
190

191 Figure 7. Not certain what color bars on top of the graph refers to. WGMS trend is the dashed line? It's not  
192 evidently clear to me.

193 The colors on the top graph of the bar refer to Reference Glaciers (gray) and to the Dolomites glaciers, following  
194 the color scale they have on the plot. We think it's clear but to avoid confusion will specify this in the figure  
195 caption. WGMS average is the only text in black and the only line in black, looks clear to us but will use a thicker  
196 black line without dashes to improve visualization.

197 Pg 16, Results - How do these results compare to Hugonnet? Add those values perhaps to one of your tables with  
198 both estimates (yours and Hugonnet) including uncertainties.

199 See the general comment above and related figure example on why we think this comparison is not that useful  
200 considering the small size of the glaciers of the Dolomites.
